# Supplementary material
Source: publisher site journal article supplement (https://scielo.br/pdf/rod/v71/2175-7860-rod-71-e04312017-suppl1.pdf)
Supplement: Supplementary file 1 [file 2175-7860-rod-71-e04312017-suppl1.pdf]

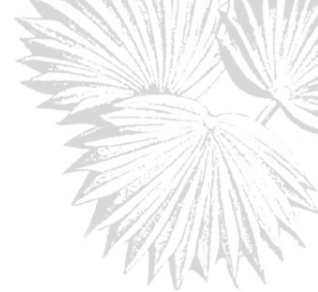

# Artigo Original / Original Paper

## Flora fanerogâmica do Jardim Botânico da Universidade Federal de Juiz de Fora, Minas Gerais, Brasil<sup>1</sup>

*Phanerogamic flora from the Botanical Garden of Federal University of Juiz de Fora, Minas Gerais, Brazil*

Camila Neves Silva<sup>1,2</sup>, Fátima Regina Gonçalves Salimena<sup>3</sup>, Fabrício Alvim Carvalho<sup>3</sup>, Luiz Menini Neto<sup>3</sup>, José Hugo Campos Ribeiro<sup>4</sup>, Cassiano Ribeiro Fonseca<sup>5</sup>, Breno Moreira<sup>6</sup>, Arthur Sérgio Mouço Valente<sup>7</sup> & Daniel Salgado Pifano<sup>2,8,9</sup>

### Resumo

O Jardim Botânico da Universidade Federal de Juiz de Fora (JB-UFJF) compreende significativo remanescente de Floresta Atlântica em área urbana no município de Juiz de Fora. Objetivando conhecer sua flora, foram realizadas coletas quinzenais na área de 80 hectares delimitada pelo JB-UFJF nos anos de 2011 a 2014. A coleção está depositada no Herbário CESJ da Universidade Federal de Juiz de Fora. Foram registradas 436 espécies, distribuídas em 270 gêneros e 96 famílias. As famílias mais ricas foram Fabaceae (35 spp.), Melastomataceae (27 spp.), Rubiaceae (27 spp.), Solanaceae (21 spp.) e Asteraceae (21 spp.). Os gêneros mais ricos foram *Miconia* (15 spp.), *Piper* (12 spp.), *Psychotria* (9 spp.) e *Solanum* (8 spp.). Seis espécies encontradas na área estão em alguma categoria de ameaça na Lista Nacional Oficial de Espécies da Flora Ameaçadas de Extinção. A composição florística mostrou ser similar a outros levantamentos na região tanto na flora geral quanto por estratos, porém também evidenciou regionalismos florísticos tanto em escala local quanto regional. A alta riqueza de espécies e outras particularidades encontradas revelam a importância da área para conservação, enfatizando sua posição como corredor ecológico na Zona da Mata, no contexto do Corredor Ecológico da Serra da Mantiqueira.

**Palavras-chave:** flora, fanerogâmica, vegetação.

### Abstract

The Botanical Garden of the Federal University of Juiz de Fora (JB-UFJF) comprises significant Atlantic Forest remnant in urban area of Juiz de Fora municipality. Aiming to know its flora, collections were carried biweekly in the 80 hectares of the JB-UFJF from 2011 to 2014. The collection is deposited in the Herbarium CESJ of the Federal University of Juiz de Fora. 436 species were found, distributed in 270 genera and 96 families. The richest families were Fabaceae (35 spp.), Melastomataceae (27 spp.), Rubiaceae (27 spp.), Solanaceae (21 spp.) and Asteraceae (21 spp.). The richest genera were *Miconia* (15 spp.), *Piper* (12 spp.), *Psychotria* (9 spp.) and *Solanum* (8 spp.). Six species found in the area are in some category of threat according to the Red List of the Brazilian Flora. The floristic composition showed to be similar to other surveys in the region both in the general flora and by strata, but also evidenced floristic regionalisms both locally and regionally. The high species richness and other particularities found reveal the importance of the area for conservation, highlighting its position as an ecological corridor in the Zona da Mata, in the context of the Ecological Corridor of Serra da Mantiqueira.

**Key words:** flora, phanerogamics, vegetation.

<sup>1</sup> Parte da Dissertação de Mestrado da primeira autora. Prog. de Pós-Graduação em Ecologia, Inst. Ciências Biológicas, Universidade Federal de Juiz de Fora, Cidade Universitária, s/n°, Martelos, 36036-900, Juiz de Fora, MG, Brasil.

<sup>2</sup> Universidade Federal do Vale do São Francisco, Colegiado de Ciências Biológicas, Campus de Ciências Agrárias, Rod. BR 407 km 12, Lote 543 Projeto de Irrigação Senador Nilo Coelho s/n°, C1, 56300-990, Petrolina, PE, Brasil.

<sup>3</sup> Universidade Federal de Juiz de Fora, Depto. Botânica, Inst. Ciências Biológicas, Cidade Universitária s/n°, Martelos, 36036-900, Juiz de Fora, MG, Brasil.

<sup>4</sup> Instituto Federal de Educação, Ciência e Tecnologia do Sudeste de Minas Gerais, Av. Monteiro de Castro 550, Barra, 36884-036, Muriaé, MG, Brasil.

<sup>5</sup> Instituto Federal de Educação, Ciência e Tecnologia do Sudeste de Minas Gerais, R. Bernardo Mascarenhas 1283, Fábrica, 36080-001, Juiz de Fora, MG, Brasil.

<sup>6</sup> Jardim Botânico da Universidade Federal de Juiz de Fora, R. Coronel Almeida Novaes 225, Santa Terezinha, Juiz de Fora, MG, Brasil.

<sup>7</sup> Instituto Estadual de Florestas, R. Santos Dumont 420, Granbery, 36010-510, Juiz de Fora, MG, Brasil.

<sup>8</sup> ORCID: <<https://orcid.org/0000-0001-8361-7337>>

<sup>9</sup> Autor para correspondência: [daniel.pifano@univasf.edu.br](mailto:daniel.pifano@univasf.edu.br)

## Introdução

Minas Gerais é o quarto maior estado brasileiro em extensão territorial e compreende uma grande diversidade de ecossistemas e ambientes, definidos pelo clima, relevo e recursos hídricos, que permitem o desenvolvimento de uma cobertura vegetal extremamente rica, incluindo dois *hotspots*, o Cerrado e a Floresta Atlântica, além da Caatinga em sua porção norte (Drummond *et al.* 2005). Apresenta flora diversificada e abriga uma riqueza florística de 14.000 espécies de plantas vasculares, sendo mais da metade endêmicas (Stehmann *et al.* 2009). Isto representa aproximadamente 25% das espécies ocorrentes no Brasil (Salino & Almeida 2009; Sobral & Stehmann 2009). A Floresta Atlântica é o Domínio que reúne a maior riqueza de espécies no âmbito nacional (19.355 espécies), sendo 7.646 endêmicas (Forzza *et al.* 2014). A Floresta Estacional Semidecidual é a fitofisionomia predominante do Domínio Atlântico em Minas Gerais, constituindo mais de 85% da área florestal original (Scolforo & Carvalho 2006), e cobriu, até meados do século XIX, quase toda a Zona da Mata (Veloso & Góes-Filho 1982).

Neste contexto, o município de Juiz de Fora, por ser o maior da mesorregião, possui importantes remanescentes desta fitofisionomia que se encontram bastante desconectados e cercados por edificações. Esses remanescentes florestais passam a ser englobados pela malha urbana e sofrem grande impacto das ações humanas, podendo apresentar composição florística e estrutura alteradas (McKinney 2006). Porém, ainda são reservatórios importantes de biodiversidade, funcionando como repositores naturais para áreas em regeneração (Alvey 2006) e ajudando na conservação da diversidade nos ambientes naturais dentro do perímetro municipal.

Informações obtidas através do aplicativo “Aqui tem Mata?” (<<http://aquitemmata.org.br/#/>>), com dados do “Atlas da Mata Atlântica”, da Fundação SOS Mata Atlântica (2017) e do Instituto Nacional de Pesquisas Especiais - INPE, dão conta que os remanescentes florestais, acima de 3 hectares, representam apenas 11,2% da Floresta Atlântica original no município de Juiz de Fora. Apesar da histórica devastação da mata primária, por intensa ação antrópica devido à cultura cafeeira e à criação de gado (Drummond *et al.* 2005) e mais recentemente a urbanização sobre os fragmentos secundários, ainda existe ou resiste significativa diversidade florística. Esse cenário motivou o

desenvolvimento de vários estudos na região a fim de conhecer a heterogeneidade florística e estrutural desses remanescentes, resultando em trabalhos sobre a flora local (Almeida & Souza 1997; Garcia 2007; Oliveira Junior 2007; Pifano *et al.* 2007; Viana *et al.* 2007; Nogueira 2011; Valente *et al.* 2011; Fonseca & Carvalho 2012; Brito & Carvalho 2014; Furtado & Menini Neto 2015; Santana *et al.* 2017; Oliveira Neto *et al.* 2017; Moreira & Carvalho 2018).

Apesar desta gama de trabalhos sobre a flora local, o Jardim Botânico da UFJF, em sua finalidade promotora de pesquisas, ainda possui alacuna de identificar o *status* de conservação de seu remanescente de Floresta Atlântica e de seus arboretos, a fim de contextualizar seus elementos florísticos para nortear sua missão institucional. Dessa forma, o presente estudo teve como objetivos descrever a flora fanerogâmica do Jardim Botânico da Universidade Federal de Juiz de Fora (JB-UFJF) e avaliar as semelhanças e diferenças florísticas entre os remanescentes já inventariados na escala local e regional.

## Material e Métodos

### Área de estudo

O município de Juiz de Fora está situado na região da Zona da Mata do estado de Minas Gerais, na bacia do Médio Paraibuna (pertencente à bacia do Rio Paraíba do Sul), ocupando uma área de 1423,5 km<sup>2</sup>, com população estimada em 2016 de 559 mil habitantes (IBGE 2011). O clima é do tipo Cwa (subtropical de altitude), segundo a classificação de Köppen, com duas estações bem definidas, apresentando temperatura e taxa de precipitação elevadas durante o verão (PMJF 2012). No município registram-se temperaturas médias de aproximadamente 18,6°C e os índices de pluviosidade oscilam entre 19 mm, de junho a agosto, e 293 mm em janeiro (PMJF 2012).

O Jardim Botânico da Universidade Federal de Juiz de Fora (JB-UFJF) está situado na coordenada 21°44'04.32"S e 43°22'10.48"W, e é delimitado pelas regiões norte e leste da cidade, áreas intensamente urbanizadas (Fig. 1). Foi criado pela UFJF em 2010 com o intuito de se transformar em importante área verde de lazer, pesquisa e educação pública e possui uma área de aproximadamente 82 ha, cujos limites são contíguos à Área de Proteção Ambiental/APA Estadual Mata do Krambeck, com 95% dos 291 ha recobertos por Floresta Estacional Semidecidual. Como se sabe, a Zona

da Mata mineira, durante todo o século XIX, teve suas florestas substituídas por cafezais e pastagens (pecuária), históricos de uso do solo também inerentes ao JB-UFJF e à APA adjacente, embora a área se encontre reflorestada e regenerada há mais de 70 anos (Costa & Silva 2011; Fonseca & Carvalho 2012; Oliveira Neto *et al.* 2017).

A vegetação remanescente do JB-UFJF é classificada como Floresta Estacional Semidecidual Montana (IBGE 2012). O relevo da área correspondente ao JB-UFJF é acidentado, apresentando uma estrutura de anfiteatro, com cotas altimétricas oscilando entre 510 e 820 m acima do nível do mar (Costa & Silva 2011), onde se verifica a dominância de rochas do tipo gnaiss e granito, muito antigas, recobertas por uma camada originada pelo processo de sedimentação. Há abundância de “argilas lateríticas”, associadas à predominância de Latossolo Vermelho Amarelo Distrófico (FEAM 2011).

### Levantamento Florístico

Foram realizadas coletas quinzenais de espécies fanerogâmicas na área delimitada para o JB-UFJF no período de março de 2011 a junho de 2014 e percorridos 82 hectares seguindo a técnica de caminhamento (Filgueiras *et al.* 1994). O material coletado foi herborizado segundo as técnicas usuais (Fidalgo & Bononi 1984) e tombado no Herbário CESJ da Universidade Federal de Juiz de Fora (acrônimo segundo Thiers, continuamente atualizado). A identificação das espécies foi realizada através de chaves de identificação, literatura especializada, comparação com materiais depositados na coleção do Herbário CESJ e consulta a especialistas. As sinonímias, a grafia e a autoria dos nomes das espécies estão de acordo com BFG (2018). Os nomes das famílias de angiospermas seguiram o sistema APG IV (2016) e as duas gimnospermas o W<sup>3</sup>Tropicos (Tropicos 2014). A distribuição geográfica das espécies foi

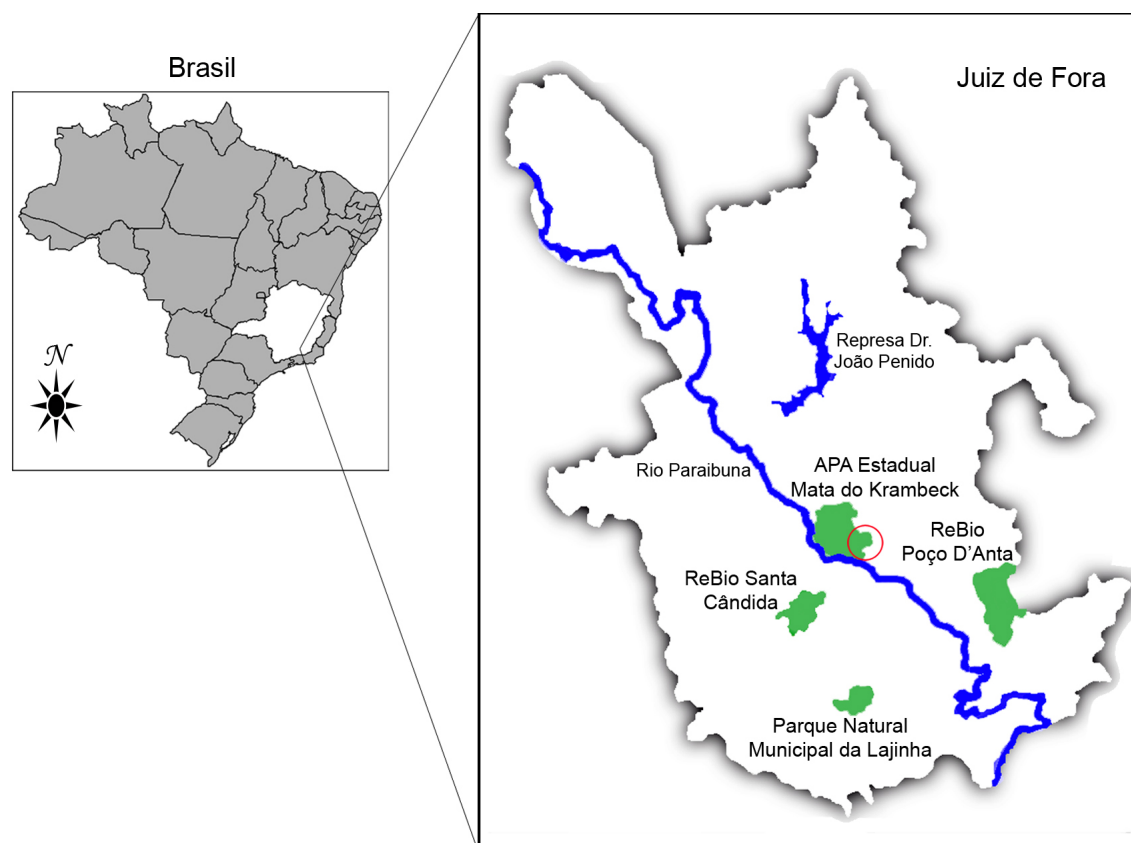

**Figura 1** – Localização do Jardim Botânico da Universidade Federal de Juiz de Fora (JB-UFJF) em Juiz de Fora, MG, com os principais fragmentos de vegetação nativa ocorrentes no município.

**Figure 1** – Location of the Botanic Garden of the Federal University of Juiz de Fora (JB-UFJF) in Juiz de Fora, MG, with the most important fragments of native vegetation occurring in the municipality.

baseada na consulta à literatura taxonômica nos sítios speciesLink (CRIA 2011) e W<sup>3</sup>Tropicos (Tropicos 2014), além do BFG (2018).

As espécies foram classificadas quanto ao hábito seguindo Gonçalves & Lorenzi (2007) (árvore, arbusto, erva, liana, epífita, parasita) e foram relacionadas com seu *status* de conservação segundo a Portaria MMA nº 44 de 17 de dezembro de 2014, que trata da Lista Nacional Oficial de Espécies da Flora Ameaçadas de extinção (MMA 2014). As espécies também foram classificadas como ruderais, exóticas, naturalizadas e cultivadas, segundo informações disponíveis em BFG (2018). Para confirmar se as espécies exóticas são também invasoras, foi consultada a obra de Lorenzi (2008). Os *habitats* ou ambientes foram definidos segundo observação pessoal dos autores, sendo classificados em: I= interior de floresta; B= borda de floresta; I.ag.= interior de floresta em área úmida e/ou próxima a curso d'água; A.um.= áreas úmidas ao redor do lago e Aquat.= macrófitas aquáticas. Somente o contato Interior/Borda mereceu status de *habitat*. Exceto isso, espécies ocorrentes em mais de um ambiente ou *habitat* foram classificadas naquele onde a mesma apresentou maiores populações ou foi mais frequentemente observada.

## Resultados

Foram encontradas 436 espécies distribuídas em 270 gêneros e 96 famílias de fanerógamas, conforme mostra a Tabela S1 (disponível no material suplementar <<https://doi.org/10.6084/m9.figshare.12421007.v1>>). Destas, apenas duas são gimnospermas: *Araucaria angustifolia* (Bertol.) Kuntze (Araucariaceae) e *Cunninghamia lanceolata* (Lamb.) Hook. (Cupressaceae). As cinco famílias com maior riqueza foram: Fabaceae (35 spp.), Melastomataceae (27), Rubiaceae (27), Solanaceae (21) e Asteraceae (21). Um total de 37 famílias (38,5% do total) está representado por apenas uma espécie. Os gêneros mais ricos foram: *Miconia* (15), *Piper* (12), *Psychotria* (9), *Solanum* (8) e *Eugenia*, *Leandra*, *Ocotea* e *Tillandsia*, com seis espécies cada.

A grande maioria das espécies encontradas é considerada nativa (404 ou 92,7% do total), 14 são cultivadas (3,1%), 11 são exóticas (e invasoras, segundo Lorenzi (2008)) (2,6%) e sete são naturalizadas (1,6%). Entre as espécies cultivadas, algumas são originárias de outras regiões do Brasil, como o pau-brasil (*Paubrasilia echinata* (Lam.) Gagnon, H.C.Lima & G.P.Lewis), a sibipiruna (*Cenostigma pluviosum* var. *peltophoroides*

(Benth.) Gagnon & G.P.Lewis) e o guapuruvu (*Schizolobium parahyba* (Vell.) S.F.Blake), e foram plantadas para sombreamento do café. Espécies ornamentais foram plantadas em vasos e jardins e, como consequência, muitas se dispersaram para o interior da floresta, com destaque para as invasoras: *Amaryllis belladonna* L., *Anthurium andraeanum* Linden, *Syngonium vellozianum* Schott, *Dracaena fragrans* (L.) Ker Gawl., *Jacquemontia paniculata* (Burm. f.) Hallier f., *Rhododendron simsii* Planch., *Dombeya wallichii* (Lindl.) Baill., *Musa rosacea* Jacq. e *Coelogyne flaccida* Lindl.

Dentre as espécies, 220 são árvores (50,5%), 93 ervas (21,3%), 57 arbustos (13,1%), 44 lianas (10,6%) e 21 epífitas (4,8%). Apenas uma espécie parasita (*Struthanthus marginatus* (Desr.) Blume) foi registrada. As famílias com maior riqueza de espécies, como Fabaceae, Melastomataceae e Rubiaceae, apresentaram representantes em todos os hábitos e os gêneros mais ricos em espécies foram, em sua maioria, compostos por arbustos do subosque no interior da floresta, como *Psychotria*, *Solanum* e *Piper*.

O interior da floresta (I) apresentou maior riqueza com 197 espécies (45,18%), seguido da borda de floresta (B) com 128 (29,36%) e das áreas úmidas ao redor do lago (A.um.) com 43 (9,86%). O *habitat* interior de floresta em área úmida (I.ag.) e as espécies hidrófitas ou macrófitas (Aquat.) correspondem respectivamente a 22 e 7 espécies, ou 5,05% e 1,61% da riqueza total.

Caracterizando a floresta do JB-UFJF em relação aos estratos e *habitats*, pode-se observar que nos 82 hectares há um interior de floresta (I) com estratos verticais bem definidos. No estrato herbáceo mais seco, em interior de floresta (I), dominaram *Ruellia brevifolia* (Pohl) C.Ezcurra, *Paradiolyra micrantha* (Kunth) Davidse & Zuloaga, *Cuphea carthagenensis* (Jacq.) J.F.Macbr., *Coccocypselum hasslerianum* Chodat, *Adenostemma brasilianum* (Pers.) Cass., *Triumfetta semitriloba* Jacq., *Leptostelma maximum* D.Don e *Heterocondylus alatus* (Vell.) R.M.King & H.Rob. Já no estrato herbáceo mais úmido, em interior de floresta (I), destacaram-se: *Hydrocotyle quinqueloba* Ruiz & Pav., *Cyclosporum leptophyllum* (Pers.) Sprague ex Britton & P.Wilson, *Hypolytrum schraderianum* Nees, *Dichorisandra hexandra* (Aubl.) C.B.Clark e *Begonia fischeri* Schrank. Algumas imagens ilustrando os estratos e a composição florística da floresta estudada encontram-se na Figura 2.

Para o estrato de subosque, as espécies que dominaram a parte mais seca, ou seja, as regiões

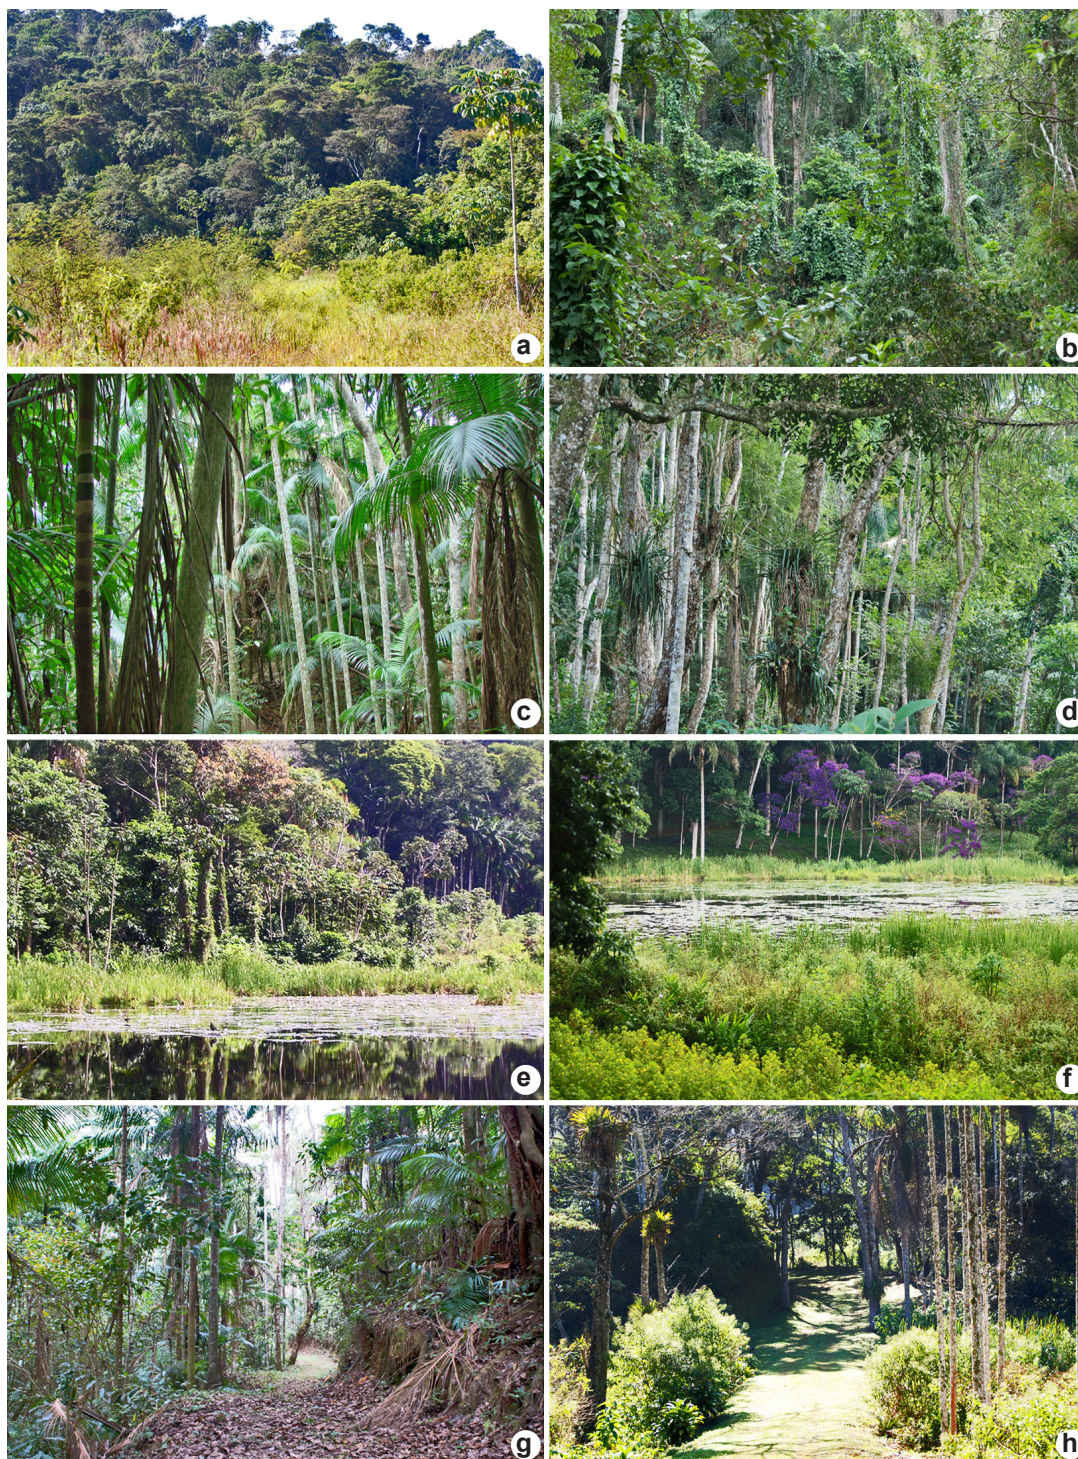

**Figura 2** – Composição florística do Jardim Botânico da UFJF – a. borda da floresta; b. interior da floresta; c. interior da floresta em área dominada por *Euterpe edulis* (Arecaceae); d. detalhe das epífitas; e-f. detalhe do lago com a vegetação aquática e vegetação circundante; g-h. trilhas entre a vegetação em regeneração que serão usadas na visitação do Jardim Botânico. Fotos: a, b, d, f, g, h. Pedro Henrique Nobre; c, e. Luiz Menini Neto.

**Figure 2** – a. border of the forest; b. interior of the forest; c. interior of the forest with dominance of *Euterpe edulis* (Arecaceae); d. detail of epiphytes; e-f. detail of the pond with aquatic vegetation and contiguous vegetation; g-h. trails between the vegetation in regeneration which will be used in the visitation of Botanic Garden. Photos: a, b, d, f, g, h. Pedro Henrique Nobre; c, e. Luiz Menini Neto.

de encosta e mais declivosas ainda do interior de floresta (I), foram: *Margaritopsis cephalantha* (Müll.Arg.) C.M.Taylor, *Miconia latecrenata* (DC.) Naudin, *M. racemifera* (DC.) Triana, *M. urophylla* DC., *Myrcia eriopus* DC., *Myrciaria glazioviana* (Kiaersk.) G.M.Barroso ex Sobral, *Piper arboreum* Aubl., *P. mollicomum* Kunth, *P. tectoniifolium* Kunth, *Psychotria carthagenensis* Jacq., *P. hastiseipala* Müll.Arg., *P. vellosiana* Benth., *Siparuna guianensis* Aubl. e *Solanum insidiosum* Mart. Já para as regiões de interior de floresta em áreas úmidas (I.ag.), próximas aos cursos d'água, destacaram-se: *Acnistus arborescens* (L.) Schldl., *Rubus brasiliensis* Mart., *Piper lagoaense* C.DC., *P. anisum* (Spreng.) Angely, *Sorocea guilleminiana* Gaudich., *Leandra nianga* (DC.) Cogn., *Mimosa vellosiana* Mart. e *Acalypha brasiliensis* Müll.Arg.

Para o estrato de dossel houve uniformidade na composição, não havendo diferenças florísticas entre as áreas mais planas e úmidas do interior de floresta (I) das áreas mais úmidas e secas das bordas (B). Destacaram-se como espécies mais representativas: *Annona dolabripetala* Raddi, *Anadenanthera colubrina* (Vell.) Brenan, *Aparisthium cordatum* (A.Juss.) Baill., *Apuleia leiocarpa* (Vogel) J.F.Macbr., *Bathysa australis* (A.St.-Hil.) K.Schum., *Cabranea canjerana* (Vell.) Mart., *Casearia arborea* (Rich.) Urb., *Cupania ludwigii* Somner & Ferrucci, *Xylopia aromatica* (Lam.) Mart., *Vernonanthura divaricata* (Spreng.) H.Rob., *Piptadenia gonoacantha* (Mart.) J.F.Macbr., *Tachigali rugosa* (Mart. ex Benth.) Zarucchi & Pipoly, *Lacistema pubescens* Mart., *Nectandra oppositifolia* Nees, *Ocotea puberula* (Rich.) Nees, *Luehea grandiflora* Mart. & Zucc., *Pleroma granulatum* (Desr.) D.Don e *Myrcia splendens* (Sw.) DC.

Espécies arbóreas, com indivíduos acima de 20 m de altura, configuraram um estrato emergente, superando o dossel. São elas: *Xylopia sericea* A.St.-Hil., *Aspidosperma olivaceum* Müll.Arg., *Euterpe edulis* Mart., *Handroanthus impetiginosus* (Mart. ex DC.) Mattos, *Croton floribundus* Spreng., *Pseudopiptadenia contorta* (DC.) G.P.Lewis & M.P.Lima, *Schizolobium parahyba*, *Matayba elaeagnoides* Radlk. e *Vochysia magnifica* Warm., não havendo variação florística neste estrato para os diferentes habitats.

No interior de floresta em área úmida e/ou próxima a curso d'água (I.ag.), assim como para as áreas úmidas ao redor do lago (A.um.) ocorre uma flora totalmente relacionada à disponibilidade hídrica abundante, com destaque

para espécies consideradas macrófitas aquáticas (Pott & Pott 2000), todas encontradas no lago ou em suas margens, tais como: *Hydrocleys nymphoides* (Willd.) Buchenau, *Eleocharis interstincta* (Vahl) Roem. & Schult., *Mayaca fluviatilis* Aubl., *Nymphoides humboldtiana* (Kunth) Kuntze, *Nymphaea caerulea* Savigny, *Ludwigia lagunae* (Morong) H.Hara e *Typha domingensis* Pers. Ainda neste contexto das áreas sob influência de cursos d'água (A.um.) destacam-se: *Aphelandra schottiana* (Nees) Profice, *Ruellia jussieuoides* Schldl. & Cham., *Cyclosporum leptophyllum*, *Geonoma schottiana* Mart., *Croton floribundus*, *Croton urucurana* Baill., *Gloxinia perennis* (L.) Fritsch, *Heliconia farinosa* Raddi, *Ocotea puberula*, *Stigmaphyllon hatschbachii* C.E.Anderson e *Guarea macrophylla* Vahl.

Segundo a Portaria MMA nº 44 de 17 de dezembro de 2014, que trata da Lista Nacional Oficial de Espécies da Flora Ameaçadas de extinção (MMA 2014), foram encontradas na categoria vulnerável *Apuleia leiocarpa*, *Dalbergia nigra* (Vell.) Allemão ex Benth., *Melanoxylon brauna* Schott, *Cedrela fissilis* Vell. e *C. odorata* L.; na categoria em perigo, *Paubrasilia echinata* e *Ocotea odorifera* (Vell.) Rohwer, e na categoria quase ameaçada, *Senecio pohlii* Sch.Bip. ex Baker, *Handroanthus impetiginosus* e *Tachigali rugosa*. Foram também encontradas três espécies citadas na Lista Vermelha da flora de Minas Gerais (Mendonça & Lins 2000): *Dorstenia arifolia* Lam., *Guatteria villosissima* A.St.-Hil. e *Handroanthus albus* (Cham.) Mattos.

## Discussão

As famílias e os gêneros mais ricos para o JB-UFJF são também os mais representativos em estudos florísticos nos fragmentos florestais do município de Juiz de Fora e outras regiões vizinhas da Zona da Mata de Minas Gerais (Meira-Neto & Martins 2002; Ribas et al. 2003; Silva et al. 2004; Campos et al. 2007; Garcia 2007; Pifano et al. 2007; Valente et al. 2011; Fonseca & Carvalho 2012; Brito & Carvalho 2014).

Os padrões de representatividade das famílias mais ricas podem ser parcialmente justificados pela irradiação concomitante de algumas delas (Fabaceae, Asteraceae e Rubiaceae) desde o fim da última glaciação (Klein 1975). Brito & Carvalho (2014) destacam para um trecho de 15 ha do JB-UFJF, composto por floresta secundária com baixa interferência antrópica há mais de 70 anos, a importância da riqueza de espécies de

Rubiaceae típicas do subosque como indicativas de uma tendência de avanço da sucessão ecológica no local. Esta foi a terceira família mais representativa para o presente trabalho e a segunda para Pifano *et al.* (2007) em levantamento florístico no Morro do Imperador, distante aproximadamente 2 km da área estudada.

Dentre os gêneros mais ricos, Pifano *et al.* (2007) também encontraram *Psychotria*, *Solanum* e *Piper* como os mais importantes arbustos do subosque. Certamente a facilidade de coleta destes indivíduos, por terem menor porte e apresentarem material fértil em grande parte do ano, justifica tal amostragem. É importante ressaltar que mesmo sendo gêneros caracterizadores de subosque em Florestas Estacionais Semidecíduais de Minas Gerais, sua composição em nível específico varia bastante de região para região dentro do estado, sustentando um regionalismo florístico interessante. Por exemplo, as espécies destes gêneros que compõem o subosque em formações semidecíduais na Bacia do Rio Doce são diferentes das que ocorrem na Bacia do Paraíba do Sul. Nessa última, os trabalhos de Pifano *et al.* (2007), Valente (2011), Fonseca & Carvalho (2012), Brito & Carvalho (2014), Oliveira Neto *et al.* (2017) e Moreira & Carvalho (2018) mostraram que o subosque é formado majoritariamente por *Psychotria carthagenensis*, *Psychotria hastisepala*, *Psychotria pleiocephala* Müll.Arg. (*Palicourea pleiocephala* (Müll.Arg.) C.M.Taylor), *Psychotria spathicalyx* Müll.Arg. e *Psychotria stachyoides* Benth., *Piper anisum*, *Piper arboreum*, *Piper mollicomum*, *Piper tectoniifolium* e *Piper umbellatum* L., além de *Solanum cernuum* Vell., *S. hexandrum* Vell., *S. insidiosum* e *S. paniculatum* L. Em contrapartida, na mesma Zona da Mata, porém na bacia do Rio Doce, os trabalhos de Meira-Neto & Martins (2002), Ribas *et al.* (2003), Silva *et al.* (2004) e Campos *et al.* (2007) relatam um subosque composto por *Psychotria rhytidocarpa* Müll.Arg., *Palicourea mamillaris* (Müll.Arg.) C.M.Taylor e *Psychotria vellosiana*, *Piper arboreum* var. *arboreum*, *Piper lucaeanum* Kunth, *Piper vicosanum* Yunck. e *Piper boucheanum* C.DC., *Solanum cinnamomeum* Sendtn., *S. cladotrichum* Dunal e *S. swartzianum* Roem. & Schult. Dessa forma, fica claro que ao comparar a composição florística do subosque do JB-UFJF com aquelas de trabalhos florísticos nas formações semidecíduais da bacia vizinha, diferenças apareceram, sustentando os regionalismos e valorizando ainda mais a perspectiva conservacionista dos remanescentes de Floresta Atlântica interiorana.

O componente arbóreo inclui várias espécies características de Florestas Semidecíduais (Oliveira-Filho & Fontes 2000) e que se destacam também como as espécies mais frequentemente encontradas em fragmentos estudados na Zona da Mata de Minas Gerais: *Annona cacans* Warm., *Casearia arborea* (Rich.) Urb., *C. obliqua* Spreng., *Handroanthus chrysotrichus* (Mart. ex A.DC.) Mattos, *Miconia cinnamomifolia* (DC.) Naudin, *M. theizans* (Bonpl.) Cogn., *Anadenanthera colubrina*, *Apuleia leiocarpa*, *Cupania oblongifolia* Mart., *C. ludowigii*, *Duguetia lanceolata* A.St.-Hil., *Guarea guidonia* (L.) Sleumer, *Myrcia multiflora* (Lam.) DC., *Ocotea puberula*, *Peltophorum dubium* (Spreng.) Taub., *Piptadenia gonoacantha*, *Solanum granulosoleprosum* Dunal e *Xylopia sericea* (Silva *et al.* 2000, 2004; Lopes *et al.* 2002a,b; Meira-Neto & Martins 2002; Marangon *et al.* 2003; Ribas *et al.* 2003; Campos *et al.* 2007; Pifano *et al.* 2007; Fonseca & Carvalho 2012; Brito & Carvalho 2014; Oliveira Neto *et al.* 2017; Moreira & Carvalho 2018).

Por outro lado, ao se observar as demais formas de vida, muitas espécies registradas (44) apresentam distribuição restrita à Região Sudeste do Brasil, sendo 16 delas encontradas exclusivamente em Minas Gerais, Rio de Janeiro e São Paulo (BFG 2018). Dentre elas, vale citar: *Hydrocotyle quinqueloba*, *Miconia urophylla*, *Piper cubataonum* C.DC., *P. lagoanense*, *Schefflera longipetiolata* (Pohl ex DC.) Frodin & Fiaschi e *Siphanthera arenaria* (DC.) Cogn. No entanto, estes registros sugerem a posição de corredor ecológico do município de Juiz de Fora, localizado entre a Serra do Mar e a Serra da Mantiqueira, indicando, portanto, uma área de transição florística entre a Floresta Ombrófila, predominante no estado do Rio de Janeiro, e a Floresta Estacional em Minas Gerais (Fonseca & Carvalho 2012; Forzza *et al.* 2014). Estes resultados são também suportados pelo trabalho de Forzza *et al.* (2014), realizado na Reserva Biológica da Represa do Gramma, município de Descoberto, MG, situado a 100 km de Juiz de Fora. Nesta Reserva é nítida a composição florística formada por uma mescla de espécies ombrófilas e semidecíduais, havendo clara tendência das formas de vida de menor porte, como ervas terrícolas e epífitas, estarem mais correlacionadas às formações ombrófilas, enquanto as árvores às formações semidecíduais, similar ao que foi encontrado no presente estudo. O grande número de espécies de distribuição restrita à Região Sudeste do Brasil, aliado à presença maciça de espécies

arbóreas características de formações Estacionais Semidecíduais, evidencia, mais uma vez, a posição de corredor ecológico do município, demonstrando a manutenção dos pequenos fragmentos como fonte de conectividade da paisagem, mantendo a porosidade da matriz (Drummond *et al.* 2005).

A existência de espécies cultivadas (de florestas ombrófilas) na área revelou aspectos interessantes, como a relação com o cultivo do café, já que algumas foram utilizadas para o sombreamento dessa cultura no local. Este é o caso de *Paubrasilia echinata* e *Cenostigma pluviosum* var. *peltophoroides*, por exemplo, que se encontram distribuídas em muitos trechos do fragmento relacionados aos sucessivos distúrbios antrópicos e ambientais aos quais o fragmento foi submetido ao longo do tempo, como corte seletivo, fragmentação e o próprio processo sucessional em função do abandono de culturas agrícolas há várias décadas (Fonseca & Carvalho 2012; Brito & Carvalho 2014; Oliveira Neto *et al.* 2017; Moreira & Carvalho 2018). Destaca-se ainda a presença de muitas assembleias de plântulas de *Coffea arabica* L. no subosque da mata em praticamente toda a área do JB-UFJF (Oliveira Neto *et al.* 2017), reduzindo a disponibilidade de luz e competindo por espaço físico com as demais plântulas de espécies nativas.

A susceptibilidade de uma comunidade vegetal à invasão por espécies exóticas e invasoras também pode ser um espelho da fragilidade de tal ambiente, uma vez que depende de características da própria comunidade e das espécies invasoras em cada situação (Ziller 2000). Conforme mencionado, o histórico de uso e ocupação da área de estudo é determinante para justificar a ocorrência de espécies exóticas no interior da floresta. Durante praticamente todo o século XX a área do JB-UFJF sofreu intervenções paisagísticas que acarretaram numa composição florística alterada pela introdução destas espécies em todo o fragmento. A presença de algumas espécies naturalizadas para a área está de acordo com o esperado para uma floresta urbana altamente impactada no pretérito (McKinney 2006), exemplificado por *Brugmansia suaveolens* (Willd.) Sweet e *Solanum americanum* Mill., citadas por Stehmann *et al.* (2009) como espécies ruderais características da Floresta Atlântica.

O hábito arbóreo foi o mais representativo, seguido pelas ervas e arbustos. Algo diferente de outros levantamentos florísticos da região, onde o hábito arbustivo é comumente o segundo mais representativo (Pifano *et al.* 2007; Forzza *et al.* 2014). É sabido que as ervas em geral possuem

ciclo de vida mais curto e muitas vezes são efêmeras, passando despercebidas pela equipe durante os trabalhos de campo. Em adição, muitas espécies herbáceas têm seu estabelecimento favorecido pela maior incidência de luz e ação mais pronunciada dos ventos (Santos *et al.* 2009), sendo encontradas tanto em ambientes de borda quanto no interior da floresta, principalmente para aquelas mais agressivas e ruderais como a maioria aqui amostrada.

A riqueza de epífitas (4,9%) foi inferior ao encontrado em levantamentos de fitofisionomias semelhantes, como os 10,3% da Reserva Biológica da Represa do Gramma (Forzza *et al.* 2014) e 8,3% do Parque Estadual do Rio Doce (Lombardi & Gonçalves 2000). Entretanto, superior ao encontrado no Morro do Imperador (1,61%) por Pifano *et al.* (2007). O Morro do Imperador e o JB-UFJF apresentam similar histórico de perturbações, com retirada seletiva de madeira e exploração predatória de orquídeas e bromélias. Além disso, a estrutura de anfiteatro da mata do JB-UFJF, com compartimentos planálticos rebaixados contrapondo-se a encostas íngremes recobertas por vegetação (aliada à presença de diversos ambientes lênticos) é responsável por criar um ambiente úmido e sombreado, com um microclima diferente do encontrado para o Morro do Imperador. Como resultado, tem-se a presença de espécies epífitas que são também comumente encontradas em áreas de Floresta Ombrófila, como *Billbergia horrida* Regel, *Campylocentrum pauloense* (Schltr.) Hoehne e *Portea petropolitana* (Wawra) Mez.

Para as trepadeiras, o JB-UFJF apresenta uma porcentagem de espécies por área inferior em relação ao Morro do Imperador (10,64% e 18,7%, respectivamente), à Reserva Biológica da Represa do Gramma (14,08%) e ao Parque Estadual do Rio Doce (12,5%). Vale lembrar que o Morro do Imperador é a área mais próxima geograficamente do JB-UFJF e que o Parque Estadual do Rio Doce, embora pertencente à Zona da Mata de Minas Gerais, está localizado em outra bacia hidrográfica. Este fato tem relação com as respostas às diferentes condições climáticas que as trepadeiras apresentam, como por exemplo a dispersão anemocórica de toda a tribo Bignoniaceae - Bignoniaceae (exclusivamente trepadora) e muitas outras famílias ricas neste hábito como Malpighiaceae, Sapindaceae, Trigoniaceae etc., resultando em uma considerável riqueza específica fortemente correlacionada com regionalismos



florísticos evidentes no Domínio da Floresta Atlântica (Gentry 1991; Clark & Clark 1999).

O JB-UFJF tem sua caracterização florística também explicada pela relação estrato/hábito. Para o estrato herbáceo houve grande representatividade de espécies de ampla distribuição e até cosmopolitas, também encontradas no Morro do Imperador. Em relação ao subosque houve uma pequena distinção florística entre o Morro do Imperador e o JB-UFJF explicada pela maior diversidade de micro-*habitats* presentes no JB-UFJF (mais úmido) em comparação com o Morro do Imperador (mais seco). Assim como a presença de *Miconia*, preferencialmente no interior do remanescente, destoa um pouco do cenário descrito por Pifano *et al.* (2007), para o qual tais espécies foram preferencialmente de borda. Essa diversidade de *habitats*, segundo Goldenberg (2000), se justifica pelo fato de o gênero ter sua distribuição espacial influenciada pelo nicho e pelo deslocamento de muitas aves de borda de mata, como Traupídeos e Tiranídeos.

Para o dossel, as espécies destacadas são todas de crescimento rápido e pouco exigentes quanto a questões nutricionais de solo, ou seja, segundo Oliveira-Filho & Scolforo (2008) podem ser consideradas como pioneiras em formações Semidecíduais em Minas Gerais. Esse cenário corrobora a composição florística encontrada para os demais estratos, onde as perturbações pretéritas têm profunda participação no *status* ainda inicial a intermediário que a floresta estudada se encontra, fato também descrito por levantamentos fitossociológicos em outras partes do Jardim Botânico (Fonseca & Carvalho 2012). Porém, os estudos realizados por Brito & Carvalho (2014) e Oliveira Neto *et al.* (2017) encontraram espécies arbóreas de crescimento mais lento e à sombra, ou seja, espécies secundárias tardias e/ou clímax (*sensu* Oliveira-Filho & Scolforo 2008) como *Melanoxylon brauna*, *Aspidosperma olivaceum*, *Cedrela fissilis* e *Lecythis pisonis* Cambess.

A presença de espécies ameaçadas de extinção mostra que a área possui potencial para a conservação da diversidade florística da região, sendo importante na conectividade entre remanescentes florestais do Corredor Ecológico da Serra do Mar. Esses dados também reforçam a falta de informações sobre a riqueza da flora local, desconhecida devido à carência de estudos florísticos mais abrangentes no município que incluam todas as formas de vida. Assim, o fragmento florestal urbano representado pela área de estudo (JB-UFJF) reúne características comuns

a outros ecossistemas que sofreram impactos moderados devido à ação humana, com riqueza intermediária e presença de espécies exóticas subespontâneas.

Esses ambientes em malhas urbanas que tiveram sua estrutura e funcionamento alterados vêm chamando a atenção em estudos recentes devido a sua representatividade cada vez maior e à importância para a conservação da biodiversidade remanescente (Marris 2009). Portanto, é iminente a consolidação de políticas para a manutenção da conservação não só deste remanescente, assim como de todo seu entorno, ou seja, a APA Krambeck, reforçando a vocação da área como um todo para a manutenção da diversidade florística.

### Agradecimentos

Agradecemos aos colegas do herbário CESJ (UFJF) o auxílio na identificação botânica; aos alunos do Laboratório de Ecologia Vegetal (Departamento de Botânica/UFJF) e ao funcionário do JB-UFJF, José Carlos, o auxílio nos trabalhos de campo; ao Programa de Pós-graduação em Ecologia (PGECOL-UFJF), o apoio logístico; à FAPEMIG, o apoio financeiro (Projeto APQ 04438/10); à CAPES, a concessão das bolsas de Mestrado a C.N. Silva, J.H.C. Ribeiro, C.R. Fonseca e B. Moreira.

### Referências

- Almeida DS & Souza AL (1997) Florística e estrutura de um fragmento de Floresta Atlântica, no município de Juiz de Fora, Minas Gerais. *Revista Árvore* 21: 221-230.
- Alvey AA (2006) Promoting and preserving biodiversity in the urban forest. *Urban Forestry & Urban Greening* 5: 195-201.
- APG IV (2016) An update of the Angiosperm Phylogeny Group classification for the orders and families of flowering plants: APG IV. *Botanical Journal of the Linnean Society* 181: 1-20.
- BFG - The Brazil Flora Group (2018) Brazilian Flora 2020: Innovation and collaboration to meet Target 1 of the Global Strategy for Plant Conservation (GSPC). *Rodriguésia* 69: 1513-1527.
- Brito PS & Carvalho FA (2014) Estrutura e diversidade arbórea da Floresta Estacional Semidecidual secundária no Jardim Botânico da Universidade Federal de Juiz de Fora. *Rodriguésia* 65: 817-830.
- Campos ACAL, Santos ACP, van den Berg E, Quinelato M & Cerqueira FM (2007) Levantamento florístico e fitossociológico da mata ciliar do rio das Mortes em São João Del-Rei, Minas Gerais. *Revista Brasileira de Biociências* 5: 1177-1179.

- Clark DB, Palmer MW & Clark DA (1999) Edaphic factors and the landscape-scale distributions of tropical rain forest trees. *Ecology* 80: 2662-2675.
- CRIA - Centro de Referência e Informação Ambiental (2011) Specieslink - simple search. Disponível em <<http://www.splink.org.br/index>>. Acesso em 2 outubro 2011.
- Drummond GM, Martins CS, Machado ABM, Sebaio FA & Antonini Y (orgs.) (2005) Biodiversidade em Minas Gerais, um atlas para sua conservação. 2ª ed. Fundação Biodiversitas, Belo Horizonte. 222p.
- FEAM (2011) Mapa de solos do Estado de Minas Gerais. Belo Horizonte: Fundação Estadual do Meio Ambiente, 2011. Disponível em <<http://www.feam.br/noticias/1/949-mapas-de-solo-do-estado-de-minas-gerais>>. Acesso em 10 outubro 2011.
- Fidalgo O & Bononi VL (1984) Técnicas de coleta, preservação e herborização de material botânico. Manual n. 4. Instituto de Botânica, São Paulo. 61p.
- Filgueiras TS, Nogueira PE, Brochado AL & Guala GF (1994) Caminhamento - um método expedito para levantamentos florísticos qualitativos. *Cadernos de Geociências* 12: 39-43.
- Fonseca CR & Carvalho FA (2012) Aspectos florísticos e fitossociológicos da comunidade arbórea de um fragmento urbano de floresta atlântica (Juiz de Fora, MG, Brasil). *Bioscience Journal* 28: 820-832.
- Forzza RC, Pifano DS, Oliveira-Filho AT, Meireles LD, Faria PL, Salimena FR, Mynssen CM & Prado J (2014) Flora vascular da Reserva Biológica da Represa do Grama, Minas Gerais, e sua relação florística com outras florestas do sudeste brasileiro. *Rodriguésia* 65: 275-292.
- Fundação SOS Mata Atlântica (2017). Aqui tem mata. Disponível em <<http://aquitemmata.org.br/#/>>. Acesso em 6 novembro 2017.
- Furtado SG & Menini Neto L (2015) Diversity of vascular epiphytes in urban environment: a case study in a biodiversity hotspot, the Brazilian Atlantic Forest. *CES Revista* 29: 82-101.
- Garcia PO (2007) Estrutura e composição do estrato arbóreo em diferentes trechos da Reserva Biológica Municipal de Santa Cândida, Juiz de Fora, MG. Dissertação de Mestrado. Universidade Federal de Juiz de Fora, Juiz de Fora. 104p.
- Gentry AH (1991) The distribution and evolution of climbing plants. In: Putz FE & Mooney HA (eds.) *The Biology of vines*. Cambridge University Press, Cambridge. Pp. 3-49.
- Gonçalves EG & Lorenzi H (2007) Morfologia vegetal: organografia e dicionário ilustrado de morfologia das plantas vasculares. Plantarum, Nova Odessa. 416p.
- Instituto Brasileiro de Geografia e Estatística - IBGE (2011) Sinopse do Senso Demográfico de 2010. Instituto Brasileiro de Geografia e Estatística, Rio de Janeiro. 270p.
- Instituto Brasileiro de Geografia e Estatística - IBGE (2012) Manual técnico da vegetação brasileira: sistema fitogeográfico, inventário das formações florestais e campestres, técnicas e manejo de coleções botânicas, procedimentos para mapeamentos. 2ª ed. Instituto Brasileiro de Geografia e Estatística, Rio de Janeiro. 275p.
- Klein RM (1975) Southern Brazilian phytogeographic features and the probable influence of upper quaternary climatic changes in floristic distribution. *Boletim Paranaense de Geociências* 33: 67-88.
- Lombardi JA & Gonçalves M (2000) Composição florística de dois remanescentes de Mata Atlântica do sudeste de Minas Gerais, Brasil. *Revista Brasileira de Botânica* 23: 255-282.
- Lopes WP, Paula A, Sevilha AC & Silva AF (2002a) Composição da flora arbórea de um trecho de floresta estacional no Jardim Botânico da Universidade Federal de Viçosa (Face Sudoeste), Viçosa, Minas Gerais. *Revista Árvore* 26: 339-347.
- Lopes WP, Silva AF, Souza AL & Neto JAAM (2002b) Estrutura fitossociológica de um trecho de vegetação arbórea no Parque Estadual do Rio Doce-Minas Gerais, Brasil. *Acta Botanica Brasilica* 16: 443-456.
- Lorenzi H (2008) Plantas daninhas do Brasil: terrestres, aquáticas, parasitas e tóxicas. Instituto Plantarum, Nova Odessa. 425p.
- Marangon LC, Soares JJ & Feliciano ALP (2003) Florística arbórea da Mata da Pedreira, município de Viçosa, Minas Gerais. *Revista Árvore* 27: 207-215.
- Marris E (2009) Ragamuffin Earth. *Nature* 460: 450-453.
- McKinney ML (2006) Urbanization as a major cause of biotic homogenization. *Biological Conservation* 127: 247-260.
- Meira-Neto JAA & Martins FR (2002) Composição florística de uma floresta estacional semidecidual montana no município de Viçosa-MG. *Revista Árvore* 26: 437-446.
- Mendonça MP & Lins LV (2000) Lista vermelha das espécies ameaçadas de extinção da flora de Minas Gerais. Biodiversitas, Belo Horizonte. 160p.
- Ministério do Meio Ambiente (2014) Portaria MMA nº 443, 17 de dezembro de 2014, que trata da Lista Nacional Oficial de Espécies da Flora Ameaçadas de extinção. Ministério do Meio Ambiente, Brasília.
- Moreira B & Carvalho FA (2018) Regeneração de agroflorestas: a importância da cobertura arbórea na transição florestal. *Biotemas* 31: 21-32.
- Nogueira MGC (2011) Bromeliaceae na Reserva Biológica Municipal do Poço D'anta, Juiz de Fora, MG. Trabalho de Conclusão de Curso (Licenciatura em Ciências Biológicas). Centro de Ensino Superior de Juiz de Fora, Juiz de Fora. 60p.
- Oliveira-Filho AT & Scolforo JRS (2008) Inventário Florestal de Minas Gerais, Espécies Arbóreas da Flora Nativa. Editora UFLA, Lavras. 619p.

- Oliveira-Filho AT & Fontes MA (2000) Patterns of floristic differentiation among Atlantic Forest in Southeastern Brazil and the influence of climate. *Biotropica* 32: 793-810.
- Oliveira Junior TG (2007) Delimitação do Microcorredor Ecológico na parte Sudeste da Bacia Hidrográfica do Córrego São Pedro, Juiz de Fora, MG. Dissertação de Mestrado. Universidade Federal de Juiz de Fora, Juiz de Fora. 80p.
- Oliveira Neto NE, Nascimento DR & Carvalho FA (2017) Biodiversity inventory of trees in a neotropical secondary forest after abandonment of shaded coffee plantation. *IForest* 10: 303-308.
- Pifano DS, Valente ASM, Castro RM, Pivari MOD, Salimena FRG & Oliveira-Filho AT (2007) Similaridade entre os *habitats* da vegetação do Morro do Imperador, Juiz de Fora, Minas Gerais, com base na composição de sua flora fanerogâmica. *Rodriguésia* 54: 885-904.
- Prefeitura Municipal de Juiz de Fora - PMJF (2012) O clima de Juiz de Fora. Disponível em <<http://www.pjf.mg.gov.br/cidade/clima.php>>. Acesso em 10 outubro 2012.
- Pott VJ & Pott A (2000) Plantas aquáticas do Pantanal. EMBRAPA, Corumbá. 404p.
- Ribas RF, Meira-Neto JAA, Silva AF & Souza AL (2003) Composição florística de dois trechos em diferentes etapas serais de uma floresta estacional semidecidual em Viçosa, Minas Gerais. *Revista Árvore* 27: 821-830.
- Salino A & Almeida TE (2009) Pteridófitas. *In*: Stehmann JR, Forzza RC, Salino A, Sobral M, Costa DP & Kamino LHY (orgs.) *Plantas da Floresta Atlântica*. Jardim Botânico do Rio de Janeiro, Rio de Janeiro. Pp. 19-25.
- Santos MF, Moreira ALC, Queiroz EP & Pigozzo CM (2009) Diferenças na composição florística entre a borda e o interior de um remanescente urbano de Mata Atlântica do 19º Batalhão de Caçadores (SSA-BA). *Candombá Revista Virtual* 5: 1-2.
- Santana LD, Furtado SG, Nardy C, Leite FS & Menini Neto L (2017) Diversity, vertical structure and floristic relationships of vascular epiphytes in an urban remnant of the Brazilian Atlantic Forest. *Hoehnea* 44: 123-138.
- Scolforo JRS & Carvalho LMT (2006) Mapeamento e inventário da flora nativa e dos reflorestamentos de Minas Gerais. Editora UFLA, Lavras. 288p.
- Silva AF, Fontes NRL & Leitão Filho HF (2000) Composição florística e estrutura horizontal do estrato arbóreo de um trecho da Mata da Biologia da Universidade Federal de Viçosa - Zona da Mata de Minas Gerais. *Revista Árvore* 24: 397-405.
- Silva CT, Reis GG, Reis MGF, Silva E & Chaves RA (2004) Avaliação temporal da florística arbórea de uma floresta secundária no município de Viçosa, Minas Gerais. *Revista Árvore* 28: 429-441.
- Sobral M & Stehmann JR (2009) An analysis of new angiosperm species discoveries in Brazil (1990-2006). *Taxon* 58: 227-232.
- Stehmann JR, Forzza RC, Sobral M & Kamino LHY (2009) Gimnospermas e angiospermas. *In*: Stehmann JR, Forzza RC, Salino A, Sobral M, Costa DP & Kamino LHY (eds.) *Plantas da Floresta Atlântica*. Jardim Botânico do Rio de Janeiro, Rio de Janeiro. Pp. 27-37.
- Thiers B [continuamente atualizado]. Index Herbariorum: A global directory of public herbaria and associated staff. New York Botanical Garden's Virtual Herbarium. Disponível em <<http://sweetgum.nybg.org/ih/>>. Acesso em 18 março 2016.
- Tropicos.org (2014) Missouri Botanical Garden. Disponível em <<http://www.tropicos.org>>. Acesso em 10 junho 2014.
- Valente ASM, Garcia PO, Salimena FR & Oliveira-Filho AT (2011) Composição, estrutura e similaridade florística da Floresta Atlântica, na Serra Negra, Rio Preto-MG. *Rodriguésia* 62: 321-340.
- Veloso HP & Góes-Filho L (1982) Classificação fisionômico-ecológica da vegetação neotropical. *Boletim Técnico Projeto Radambrasil*. Vol. 7. IBGE, Salvador. 86p.
- Viana FMF, Freitas LB, Clemente MA, Alves FC, Gomes FT & Salimena FRG (2007) Levantamento florístico da Mata do Parque da Laginha de Juiz de Fora - MG. *In*: *Anais do VIII Congresso de Ecologia do Brasil*, Caxambu, MG. Pp. 1-2.
- Ziller SRA (2000) Estepe gramíneo-lenhosa no segundo planalto do Paraná: diagnóstico ambiental com enfoque à contaminação biológica. Tese de Doutorado. Universidade Federal do Paraná, Curitiba. 268p.

Editor de área: Dr. Gustavo Shimizu

Artigo recebido em 06/12/2017. Aceito para publicação em 22/12/2018.

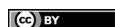

This is an open-access article distributed under the terms of the Creative Commons Attribution License.
